# Supplementary material for: Effects of thermal stress on amount, composition, and antibacterial properties of coral mucus
Source: PeerJ. 2019 Apr 29;7:e6849. doi: 10.7717/peerj.6849 (PMC6497039; doi:10.7717/peerj.6849)
Supplement: Data S1 [file peerj-07-6849-s002.xlsx]

## Sheet: lipid
geno	treat	lipidDate	lipidConc_mg_mL
2	c	7april	-0.197381
2	h	7april	-0.138281
28	h	7april	-0.0149122
28	c	7april	0.111731
63	h	7april	0.114315
63	c	7april	0.194953
34	h	7april	0.181858
34	c	7april	0.0188592
54	h	7april	0.27361
54	c	7april	0.0881252
29	h	7april	0.326765
29	c	7april	0.197193
58	h	7april	0.289375
58	c	7april	0.15205
35	h	7april	0.29868
35	c	7april	0.0428094
8	h	7april	-0.0705662
8	c	7april	0.102943
30	h	7april	0.0733071
30	c	7april	0.0953619
10	h	7april	0.151533
1	c	24march	0.239225
1	h	24march	0.128132
9	c	24march	0.188451
9	h	24march	0.205933
53	c	24march	0.0278973
53	h	24march	0.222698
57	c	24march	0.0456173
57	h	24march	0.0834438

## Sheet: carb
geno	treat	carbDate	carbConc_mg_mL
58	h	2dec	0.571632
30	h	2dec	0.451115
58	c	2dec	0.0383996
30	c	2dec	-0.0665269
30	c	20jan	-0.000567297
1	h	20jan	0.0100161
1	c	20jan	0.00403457
2	h	20jan	0.0190565
2	c	20jan	0.00421611
8	h	20jan	0.00545961
8	c	20jan	0.00314506
9	h	20jan	0.00601329
9	c	20jan	0.00405273
28	h	20jan	0.00797385
28	c	20jan	0.00479701
29	h	20jan	0.00810092
29	c	20jan	0.00629466
34	h	20jan	0.0106061
34	c	20jan	0.00509654
35	h	20jan	0.0105698
35	c	20jan	0.00807369
53	h	20jan	0.0170233
53	c	20jan	0.0070208
54	h	20jan	0.00561845
54	c	20jan	0.0066305
57	h	20jan	0.00670765
57	c	20jan	0.00510562
63	h	20jan	0.00976195
63	c	20jan	0.00848214

## Sheet: protein
geno	treat	protDate	protConc_mg_mL	protExtraction	protZoox
28	h	6oct	14.6011	1	n
63	h	6oct	19.9585	1	n
57	h	6oct	17.1142	1	n
2	h	6oct	22.0104	1	n
10	h	6oct	21.2803	1	n
9	h	6oct	18.7819	1	n
53	h	6oct	20.9514	1	n
1	h	6oct	21.7054	1	n
54	h	6oct	19.4752	1	n
8	h	6oct	11.8513	1	n
35	h	6oct	22.2737	1	n
30	h	6oct	18.1831	1	n
35	c	6oct	13.0882	1	n
1	c	6oct	6.01106	1	n
9	c	6oct	10.4902	1	n
63	c	6oct	10.3162	1	n
29	c	6oct	9.54586	1	n
30	c	6oct	8.29052	1	n
58	c	6oct	7.28175	1	n
54	c	6oct	7.72544	1	n
8	c	6oct	7.5286	1	n
28	c	6oct	6.88508	1	n
34	c	6oct	7.38316	1	n
57	c	6oct	8.24139	1	n
58	h	13oct	6.56116	2	n
30	h	13oct	5.77956	2	n
54	h	13oct	4.41071	2	n
34	h	13oct	8.85491	2	n
53	h	13oct	7.11193	2	n
28	h	13oct	9.3397	2	n
58	c	13oct	6.21728	2	n
30	c	13oct	6.67841	2	n
54	c	13oct	7.26733	2	n
34	c	13oct	4.06961	2	n
53	c	13oct	3.56066	2	n
28	c	13oct	6.53091	2	n
8	h	14oct	2.94131	2	n
35	h	14oct	2.41201	2	n
57	h	14oct	3.37923	2	n
1	h	14oct	3.76256	2	n
2	h	14oct	4.97504	2	n
8	c	14oct	4.21173	2	n
35	c	14oct	7.54693	2	n
57	c	14oct	3.44448	2	n
1	c	14oct	2.56341	2	n
2	c	14oct	2.92878	2	n
29	h	11may	19.9351	1	n
34	h	11may	17.3656	1	n
58	h	11may	7.53876	1	n
2	c	11may	3.83507	1	n
53	c	11may	2.88719	1	n
57	c	11may	3.68977	1	n
10	h	11may	5.44505	2	z
9	c	11may	3.96903	2	z
29	c	11may	6.74664	2	z
63	c	11may	7.33885	2	z

## Sheet: antibac
well	geno	treat	rep	0	0.5	1	1.5	2	2.5	3	3.5	4	4.5	5	5.5	6	6.5	7	7.5	8	8.5	9	9.5	10	10.5	11	11.5	12
A1	A	M	1	0.0409	0.0409	0.0451	0.0434	0.0417	0.0475	0.0425	0.0436	0.0438	0.042	0.0424	0.0425	0.0426	0.0429	0.0446	0.0421	0.0427	0.0446	0.0437	0.0457	0.0428	0.0432	0.0433	0.044	0.0444
A2	A	M	2	0.0389	0.041	0.0424	0.039	0.0384	0.0387	0.0386	0.0384	0.0386	0.039	0.0383	0.039	0.0392	0.039	0.0388	0.0385	0.0394	0.0394	0.0384	0.0388	0.039	0.0393	0.0385	0.039	0.0388
A3	A	M	3	0.0427	0.044	0.0421	0.0412	0.041	0.0397	0.0399	0.041	0.0433	0.0404	0.0408	0.0416	0.0409	0.0413	0.0396	0.0388	0.0387	0.0391	0.0388	0.0394	0.0392	0.0393	0.0394	0.0405	0.04
A4	53	C	1	0.1976	0.2004	0.1995	0.1898	0.1904	0.1908	0.1903	0.1878	0.1869	0.1854	0.1849	0.1856	0.1835	0.184	0.1831	0.1824	0.18	0.1789	0.1777	0.1763	0.1749	0.1712	0.1676	0.1647	0.1626
A5	53	C	2	0.2082	0.2104	0.2151	0.2025	0.1955	0.1947	0.1935	0.1941	0.1946	0.1941	0.1968	0.1938	0.191	0.1912	0.1907	0.1881	0.1912	0.1849	0.1811	0.1845	0.1794	0.1733	0.1696	0.1658	0.1614
A6	53	C	3	0.2016	0.2195	0.2188	0.2013	0.1903	0.1921	0.1868	0.1859	0.1836	0.1861	0.1842	0.1841	0.1838	0.1818	0.1791	0.1773	0.1751	0.1731	0.1701	0.1683	0.1653	0.1591	0.1545	0.1475	0.1392
A7	63	C	1	0.1993	0.1997	0.1965	0.1943	0.1917	0.1906	0.1878	0.1867	0.1865	0.1883	0.1859	0.1851	0.1839	0.1829	0.1813	0.1806	0.1784	0.1748	0.171	0.1695	0.1664	0.162	0.1551	0.1481	0.1459
A8	63	C	2	0.2044	0.2049	0.1992	0.1931	0.1925	0.1905	0.1897	0.1888	0.1895	0.1901	0.1879	0.187	0.1875	0.1844	0.1836	0.181	0.181	0.1763	0.1747	0.1709	0.1707	0.1606	0.1557	0.1509	0.1451
A9	63	C	3	0.2031	0.196	0.1927	0.1898	0.1896	0.1883	0.1882	0.1886	0.1869	0.1868	0.1868	0.1854	0.1835	0.1828	0.1803	0.1774	0.1759	0.1731	0.17	0.164	0.1619	0.1599	0.1502	0.1402	0.1349
A10	35	C	1	0.21	0.2102	0.1917	0.1928	0.1905	0.1888	0.1911	0.1904	0.1884	0.1901	0.1885	0.186	0.1848	0.1814	0.1791	0.176	0.1737	0.1671	0.1634	0.1593	0.1638	0.1461	0.1388	0.1284	0.1168
A11	35	C	2	0.2271	0.23	0.2059	0.2068	0.2035	0.2019	0.2013	0.2003	0.2003	0.2001	0.1996	0.1995	0.1944	0.1942	0.1931	0.1901	0.1886	0.1818	0.1772	0.1755	0.1667	0.1618	0.1584	0.145	0.1344
A12	35	C	3	0.2	0.1991	0.192	0.1885	0.1869	0.1866	0.1882	0.1896	0.1886	0.1858	0.1855	0.1835	0.1818	0.1779	0.1775	0.1721	0.1685	0.1618	0.1558	0.1529	0.1417	0.1352	0.1217	0.1099	0.0948
B1	A	P	1	0.2033	0.1929	0.1907	0.187	0.1857	0.1829	0.1812	0.1779	0.1756	0.1739	0.1719	0.1702	0.167	0.1677	0.1664	0.1626	0.1591	0.1574	0.159	0.1564	0.1523	0.1511	0.1591	0.1504	0.1465
B2	A	P	2	0.2146	0.2116	0.2135	0.204	0.2009	0.1986	0.1968	0.1897	0.1873	0.182	0.1783	0.177	0.1695	0.168	0.169	0.1632	0.1629	0.1611	0.1624	0.168	0.1597	0.1583	0.1563	0.1733	0.1598
B3	A	P	3	0.2172	0.2085	0.2061	0.2022	0.2012	0.1995	0.1949	0.1921	0.1904	0.1847	0.1815	0.1773	0.1703	0.167	0.1643	0.1608	0.1617	0.1599	0.2161	0.1801	0.1536	0.1521	0.1523	0.1519	0.1484
B4	53	H	1	0.2187	0.1958	0.1916	0.1893	0.1885	0.1878	0.1877	0.1889	0.1881	0.1881	0.1887	0.1878	0.1879	0.1869	0.1875	0.1864	0.1847	0.1834	0.1821	0.1832	0.1802	0.1793	0.1781	0.1777	0.174
B5	53	H	2	0.2225	0.1906	0.1859	0.1832	0.1818	0.1813	0.1804	0.1801	0.1795	0.1806	0.1795	0.1808	0.1808	0.1803	0.1804	0.1818	0.178	0.1779	0.1744	0.174	0.1726	0.1709	0.1684	0.1672	0.1628
B6	53	H	3	0.2094	0.1967	0.1901	0.1873	0.1866	0.1854	0.1844	0.184	0.1849	0.1834	0.1831	0.1844	0.1833	0.1845	0.184	0.1845	0.1821	0.1803	0.1783	0.1765	0.1758	0.1726	0.1731	0.1723	0.1668
B7	63	H	1	0.1958	0.1879	0.1834	0.1811	0.1805	0.1803	0.1808	0.1808	0.1806	0.1803	0.1786	0.1787	0.1773	0.1773	0.1758	0.1787	0.1737	0.1742	0.1688	0.1782	0.1659	0.1601	0.1549	0.1542	0.1453
B8	63	H	2	0.2078	0.1937	0.1919	0.1895	0.1891	0.1887	0.1884	0.1876	0.1884	0.1882	0.1906	0.1859	0.1844	0.1841	0.1837	0.1819	0.1791	0.1763	0.173	0.172	0.1688	0.1641	0.1597	0.1552	0.1522
B9	63	H	3	0.1952	0.1871	0.1829	0.1798	0.1794	0.1791	0.1822	0.1815	0.1797	0.1808	0.1773	0.1781	0.1757	0.1761	0.1731	0.1723	0.1692	0.1671	0.1644	0.162	0.1569	0.1523	0.1461	0.1397	0.1327
B10	35	H	1	0.2149	0.1956	0.1921	0.1893	0.1884	0.1873	0.1896	0.1873	0.187	0.1861	0.1846	0.186	0.1802	0.1808	0.1823	0.1757	0.1745	0.1771	0.1727	0.1655	0.1626	0.1656	0.1645	0.1588	0.1393
B11	35	H	2	0.2075	0.1894	0.1864	0.1853	0.1825	0.1822	0.1836	0.1823	0.1847	0.1844	0.1831	0.1807	0.1813	0.1776	0.1756	0.1752	0.172	0.1681	0.1638	0.1603	0.1547	0.1493	0.1421	0.1417	0.1263
B12	35	H	3	0.2166	0.1941	0.1899	0.1877	0.1868	0.1849	0.1858	0.1859	0.1891	0.1867	0.1855	0.1892	0.1899	0.1805	0.1805	0.1765	0.1778	0.1721	0.165	0.1625	0.1567	0.1491	0.1371	0.1283	0.1147
C1	L	P	1	0.192	0.1865	0.1947	0.2239	0.2683	0.2987	0.317	0.3278	0.3341	0.3362	0.3398	0.3436	0.3475	0.3481	0.3493	0.3623	0.3692	0.3785	0.3862	0.3945	0.402	0.4111	0.4152	0.4222	0.4363
C2	L	P	2	0.1923	0.187	0.1952	0.2248	0.2681	0.3018	0.3255	0.3413	0.3485	0.3523	0.356	0.3607	0.3632	0.3658	0.3719	0.3842	0.3952	0.4058	0.4124	0.4147	0.4222	0.4315	0.4419	0.4498	0.4582
C3	L	P	3	0.1864	0.181	0.1883	0.2159	0.2628	0.2992	0.3194	0.3303	0.3354	0.3375	0.3391	0.3423	0.3455	0.3482	0.3532	0.3621	0.3726	0.3844	0.3961	0.4081	0.4104	0.4215	0.4377	0.4492	0.451
C4	57	C	1	0.1938	0.1897	0.202	0.1948	0.1836	0.1833	0.1836	0.1831	0.1807	0.1795	0.1783	0.1776	0.1771	0.1771	0.176	0.1756	0.1739	0.1734	0.1717	0.1702	0.1694	0.1668	0.1663	0.163	0.1601
C5	57	C	2	0.1906	0.1766	0.1734	0.1909	0.2159	0.1844	0.1752	0.1707	0.1692	0.1696	0.1679	0.169	0.1682	0.1678	0.1661	0.165	0.1641	0.164	0.1618	0.1592	0.1587	0.1538	0.1517	0.1494	0.1459
C6	57	C	3	0.1939	0.1893	0.2088	0.1893	0.1869	0.1824	0.1791	0.178	0.1774	0.1775	0.1767	0.1766	0.1747	0.1758	0.1736	0.1729	0.1716	0.1701	0.1684	0.1659	0.1633	0.1604	0.157	0.1545	0.1494
C7	34	C	1	0.203	0.203	0.1865	0.1879	0.1848	0.1809	0.1811	0.1767	0.1758	0.1754	0.1739	0.1741	0.1725	0.1718	0.1688	0.1683	0.1664	0.1661	0.1606	0.1576	0.1578	0.1573	0.1498	0.1437	0.1443
C8	34	C	2	0.1978	0.1973	0.1914	0.2233	0.1928	0.1886	0.1866	0.185	0.1867	0.1816	0.1807	0.1792	0.1775	0.1762	0.1748	0.1728	0.1711	0.1681	0.1659	0.1632	0.1593	0.1548	0.1506	0.1461	0.1403
C9	34	C	3	0.1953	0.1976	0.2019	0.2332	0.2204	0.2008	0.198	0.1903	0.1865	0.1777	0.1759	0.1736	0.1729	0.1731	0.1691	0.1668	0.1656	0.1626	0.1598	0.1558	0.1519	0.1476	0.1424	0.1369	0.1295
C10	58	C	1	0.2012	0.1967	0.2093	0.2344	0.2297	0.1995	0.1971	0.194	0.1898	0.1839	0.1808	0.1807	0.1775	0.176	0.1732	0.1709	0.1677	0.1657	0.1626	0.1573	0.1523	0.1465	0.1404	0.1353	0.1257
C11	58	C	2	0.1991	0.1966	0.2261	0.1947	0.1958	0.1922	0.192	0.1827	0.1768	0.1745	0.1727	0.173	0.1699	0.169	0.1659	0.1638	0.1625	0.1588	0.1525	0.1501	0.1457	0.138	0.1301	0.1266	0.1184
C12	58	C	3	0.2004	0.1951	0.1981	0.1885	0.196	0.1966	0.1952	0.1869	0.1861	0.1804	0.1767	0.1757	0.1737	0.1726	0.1695	0.166	0.1616	0.1595	0.1531	0.1504	0.1481	0.1376	0.1328	0.1264	0.1132
D1	10	H	1	0.1966	0.1861	0.176	0.1739	0.1724	0.1706	0.1696	0.1694	0.1724	0.1702	0.1695	0.1705	0.1705	0.1715	0.1711	0.1712	0.171	0.1705	0.1692	0.1703	0.1738	0.1719	0.1661	0.1632	0.161
D2	10	H	2	0.2312	0.1867	0.1797	0.1769	0.1745	0.1722	0.1716	0.1708	0.1704	0.1731	0.1733	0.1748	0.1742	0.1744	0.1733	0.1756	0.1747	0.1734	0.1725	0.1732	0.1727	0.1711	0.17	0.17	0.1673
D3	10	H	3	0.2171	0.1845	0.1791	0.1747	0.1723	0.1724	0.1712	0.1715	0.1712	0.1728	0.1718	0.1727	0.1734	0.174	0.1729	0.1732	0.1722	0.1731	0.1716	0.1717	0.1707	0.1699	0.1679	0.1672	0.1639
D4	57	H	1	0.2119	0.1838	0.1787	0.1768	0.1765	0.1761	0.1744	0.1741	0.1746	0.1757	0.1747	0.1757	0.1741	0.1752	0.1732	0.173	0.1732	0.174	0.1712	0.1716	0.1688	0.1677	0.1652	0.1637	0.1606
D5	57	H	2	0.1949	0.1792	0.177	0.175	0.1737	0.1721	0.1723	0.1732	0.1726	0.1716	0.1713	0.173	0.1711	0.1719	0.1707	0.1716	0.1697	0.1693	0.1676	0.1666	0.1637	0.1613	0.1629	0.1601	0.1546
D6	57	H	3	0.1896	0.2022	0.1779	0.1764	0.1753	0.1733	0.173	0.1723	0.1715	0.1725	0.171	0.1716	0.1704	0.1705	0.1695	0.1688	0.1672	0.1668	0.1647	0.1624	0.1606	0.1578	0.1547	0.1517	0.1485
D7	34	H	1	0.2186	0.1841	0.1802	0.1778	0.176	0.1744	0.1745	0.1737	0.173	0.1754	0.1749	0.1751	0.1726	0.1724	0.171	0.1706	0.1695	0.1691	0.1674	0.1646	0.1633	0.1605	0.1609	0.1581	0.1525
D8	34	H	2	0.2217	0.1838	0.18	0.1795	0.1763	0.1743	0.184	0.1737	0.1726	0.1744	0.1743	0.1737	0.1808	0.1717	0.1729	0.1702	0.168	0.1682	0.165	0.168	0.1613	0.1611	0.1533	0.1539	0.1462
D9	34	H	3	0.1927	0.1803	0.1767	0.1743	0.1734	0.1725	0.1711	0.1721	0.171	0.1714	0.1725	0.1715	0.1701	0.1685	0.1684	0.1662	0.1664	0.1637	0.1618	0.1584	0.1559	0.1527	0.1492	0.1448	0.1385
D10	58	H	1	0.2057	0.1878	0.1834	0.1858	0.1945	0.1766	0.1786	0.1763	0.1772	0.1791	0.176	0.1764	0.1757	0.1736	0.177	0.1786	0.1689	0.1667	0.1666	0.1631	0.1521	0.1479	0.1461	0.1371	0.1339
D11	58	H	2	0.1943	0.1847	0.1774	0.176	0.1759	0.1753	0.1735	0.1749	0.1744	0.1741	0.1719	0.1737	0.1701	0.1693	0.1667	0.1648	0.1615	0.1585	0.1555	0.1505	0.1465	0.1415	0.1338	0.1258	0.1189
D12	58	H	3	0.1969	0.1827	0.18	0.178	0.1766	0.1758	0.1752	0.175	0.1756	0.1764	0.1734	0.1726	0.1711	0.1684	0.1673	0.1637	0.1622	0.158	0.1531	0.1471	0.1413	0.1341	0.1293	0.1203	0.1116
E1	9	C	1	0.1951	0.1875	0.1824	0.1803	0.1982	0.1839	0.1826	0.1765	0.1761	0.1749	0.1741	0.1751	0.1749	0.1735	0.1729	0.1715	0.1716	0.1708	0.1686	0.1664	0.1659	0.1631	0.159	0.1569	0.1547
E2	9	C	2	0.1908	0.1961	0.1763	0.1733	0.1727	0.1723	0.1715	0.1718	0.1727	0.1733	0.1722	0.1729	0.1721	0.1724	0.1703	0.1702	0.1706	0.1677	0.1675	0.1653	0.1637	0.163	0.1609	0.1599	0.1572
E3	9	C	3	0.199	0.2475	0.1811	0.1787	0.1792	0.1798	0.1772	0.1769	0.1762	0.1763	0.1762	0.1772	0.1795	0.1768	0.1752	0.1754	0.1743	0.1727	0.1709	0.1707	0.172	0.1686	0.1658	0.1637	0.1587
E4	2	C	1	0.1958	0.1894	0.1797	0.1762	0.1752	0.1769	0.1744	0.1736	0.1716	0.1724	0.1719	0.1722	0.1709	0.1716	0.1726	0.1708	0.1685	0.169	0.1674	0.1716	0.1651	0.1687	0.1632	0.1574	0.1561
E5	2	C	2	0.1939	0.2105	0.1913	0.1841	0.1867	0.1835	0.1789	0.1771	0.1752	0.1738	0.174	0.1732	0.1736	0.1717	0.1715	0.1733	0.1692	0.1688	0.169	0.1683	0.1656	0.1614	0.1597	0.1563	0.1535
E6	2	C	3	0.1925	0.1838	0.1951	0.1802	0.1812	0.1807	0.177	0.1743	0.1719	0.1723	0.171	0.1719	0.17	0.17	0.1693	0.1677	0.1669	0.166	0.1633	0.1637	0.1613	0.1571	0.1543	0.1516	0.1464
E7	30	C	1	0.1874	0.1839	0.1851	0.1903	0.184	0.1751	0.1724	0.1717	0.1711	0.1706	0.1698	0.1691	0.1679	0.1687	0.1647	0.1635	0.1614	0.1596	0.1579	0.157	0.1531	0.15	0.1469	0.1429	0.1385
E8	30	C	2	0.1933	0.186	0.1921	0.1785	0.1785	0.1735	0.1725	0.1716	0.1699	0.1704	0.1695	0.1695	0.1685	0.168	0.1665	0.1645	0.1627	0.1618	0.1596	0.1572	0.1546	0.1508	0.1469	0.1431	0.1367
E9	30	C	3	0.1932	0.2006	0.1949	0.1942	0.1827	0.1787	0.1736	0.1725	0.1719	0.1724	0.1709	0.1714	0.1681	0.166	0.1648	0.1627	0.1609	0.159	0.156	0.1538	0.1514	0.1485	0.1426	0.138	0.1307
E10	29	C	1	0.192	0.1885	0.197	0.1796	0.1763	0.1752	0.1742	0.1728	0.173	0.1719	0.1721	0.1709	0.1689	0.1683	0.1658	0.164	0.1621	0.1596	0.1569	0.1528	0.1484	0.1445	0.1391	0.1315	0.1249
E11	29	C	2	0.1944	0.1877	0.1907	0.1798	0.1779	0.1756	0.1745	0.1749	0.1728	0.1738	0.1718	0.1705	0.1682	0.1673	0.1646	0.1618	0.1588	0.1554	0.1522	0.1478	0.1433	0.1366	0.129	0.1225	0.1118
E12	29	C	3	0.1889	0.1953	0.1847	0.1781	0.1741	0.1718	0.171	0.1709	0.1732	0.1689	0.169	0.167	0.163	0.1612	0.1594	0.1561	0.1637	0.1508	0.1449	0.1441	0.1334	0.1266	0.1294	0.111	0.097
F1	9	H	1	0.1957	0.1813	0.1756	0.1725	0.1727	0.1718	0.1718	0.1713	0.1709	0.1714	0.1714	0.1713	0.1695	0.1724	0.1685	0.1672	0.1654	0.1639	0.1633	0.1601	0.1574	0.1572	0.1521	0.1488	0.143
F2	9	H	2	0.1897	0.1795	0.176	0.172	0.1711	0.1708	0.1722	0.1718	0.1725	0.1716	0.1704	0.1702	0.1718	0.169	0.168	0.1669	0.1661	0.166	0.1621	0.1606	0.1588	0.1559	0.1555	0.151	0.147
F3	9	H	3	0.2029	0.1874	0.1828	0.1797	0.1775	0.1768	0.1792	0.1775	0.1782	0.1775	0.177	0.1774	0.1769	0.1745	0.1743	0.1742	0.172	0.1718	0.1707	0.1683	0.1657	0.1649	0.1595	0.1614	0.1544
F4	2	H	1	0.1988	0.1798	0.175	0.1725	0.171	0.1706	0.1738	0.1744	0.1751	0.1756	0.1752	0.178	0.1763	0.175	0.1759	0.1756	0.1716	0.1702	0.174	0.168	0.1653	0.1698	0.1608	0.1573	0.1527
F5	2	H	2	0.1978	0.1795	0.1749	0.1725	0.1727	0.1726	0.1716	0.1728	0.1721	0.1715	0.1744	0.1723	0.1725	0.1706	0.1726	0.1788	0.1669	0.1671	0.1648	0.1644	0.1637	0.1589	0.1546	0.1502	0.1459
F6	2	H	3	0.1932	0.1808	0.1767	0.1739	0.172	0.1707	0.1702	0.1699	0.1681	0.1705	0.1701	0.1721	0.171	0.1707	0.1697	0.1693	0.1665	0.167	0.1627	0.1625	0.1606	0.1571	0.1529	0.1477	0.1425
F7	30	H	1	0.1816	0.1716	0.169	0.1668	0.1668	0.1655	0.1642	0.1651	0.1647	0.1646	0.1631	0.1638	0.1635	0.1612	0.1603	0.1585	0.1558	0.1542	0.1515	0.1493	0.1467	0.1415	0.1375	0.1325	0.1254
F8	30	H	2	0.1875	0.1763	0.1735	0.1719	0.1699	0.1698	0.1697	0.1679	0.169	0.1695	0.1671	0.1667	0.1672	0.1652	0.1623	0.1617	0.1589	0.1568	0.1538	0.1519	0.1476	0.1438	0.1383	0.1334	0.1263
F9	30	H	3	0.1947	0.1802	0.1766	0.175	0.1752	0.1729	0.1722	0.1727	0.1727	0.1741	0.1715	0.1715	0.1699	0.1686	0.1666	0.1676	0.1633	0.1614	0.1574	0.1558	0.1514	0.1478	0.1416	0.1374	0.1304
F10	29	H	1	0.1887	0.1773	0.1736	0.1716	0.1716	0.1705	0.1705	0.1706	0.1706	0.1706	0.17	0.1722	0.1683	0.1688	0.1656	0.1621	0.1604	0.1575	0.1549	0.152	0.1471	0.1408	0.1347	0.1292	0.1205
F11	29	H	2	0.1885	0.1769	0.1744	0.1717	0.1713	0.175	0.1698	0.1731	0.1733	0.1694	0.1749	0.1686	0.1661	0.1646	0.1624	0.1604	0.1567	0.1559	0.1522	0.1457	0.1403	0.1388	0.1293	0.1209	0.1114
F12	29	H	3	0.1935	0.1794	0.1755	0.1728	0.1725	0.1718	0.1715	0.1716	0.172	0.1732	0.1707	0.1695	0.168	0.1645	0.1623	0.1585	0.1553	0.1529	0.1452	0.1395	0.1332	0.127	0.1159	0.1075	0.0932
G1	1	C	1	0.1891	0.1915	0.1865	0.1859	0.1812	0.1757	0.1722	0.1704	0.1702	0.1712	0.169	0.1686	0.1681	0.1668	0.1647	0.163	0.1615	0.1586	0.1547	0.1532	0.1491	0.1451	0.1382	0.1335	0.1267
G2	1	C	2	0.1877	0.1816	0.1739	0.1745	0.1772	0.1741	0.1765	0.1788	0.1701	0.1692	0.1662	0.1663	0.1651	0.1657	0.1636	0.1619	0.1604	0.1573	0.1572	0.1529	0.1513	0.1465	0.1411	0.1383	0.1322
G3	1	C	3	0.1899	0.1876	0.1799	0.179	0.1777	0.175	0.1735	0.1714	0.1705	0.1703	0.1718	0.1701	0.168	0.1674	0.1666	0.164	0.1628	0.1605	0.1577	0.1565	0.1533	0.1499	0.1447	0.1419	0.1389
G4	28	C	1	0.1853	0.1753	0.172	0.1686	0.1671	0.1732	0.1771	0.175	0.168	0.1655	0.1636	0.1652	0.1627	0.1614	0.1599	0.1574	0.1545	0.1529	0.1497	0.1472	0.1442	0.1396	0.133	0.1285	0.1207
G5	28	C	2	0.191	0.1792	0.1999	0.1764	0.1755	0.1732	0.173	0.1734	0.1709	0.1692	0.168	0.1672	0.1662	0.1644	0.1617	0.1613	0.1599	0.1558	0.1524	0.1499	0.1489	0.1388	0.1338	0.1276	0.1226
G6	28	C	3	0.1906	0.1846	0.1788	0.1989	0.1933	0.1801	0.1753	0.1717	0.1704	0.171	0.1687	0.1686	0.1665	0.1651	0.1629	0.1603	0.1567	0.1539	0.1508	0.1494	0.1425	0.1379	0.1306	0.1233	0.1156
G7	8	C	1	0.187	0.1891	0.193	0.2069	0.179	0.1739	0.1708	0.1723	0.1711	0.1706	0.1685	0.1685	0.1647	0.1642	0.1627	0.16	0.157	0.1535	0.1511	0.1456	0.1434	0.1354	0.1288	0.1229	0.1135
G8	8	C	2	0.1964	0.1862	0.1869	0.1907	0.1928	0.1879	0.1801	0.1734	0.1732	0.1731	0.1706	0.1698	0.1686	0.1659	0.164	0.1615	0.1591	0.1555	0.1523	0.1486	0.1429	0.1366	0.1282	0.1212	0.1122
G9	8	C	3	0.1922	0.1853	0.189	0.2195	0.1909	0.1858	0.1806	0.1746	0.1737	0.1739	0.1719	0.1714	0.1693	0.1671	0.1651	0.1628	0.1596	0.1562	0.1529	0.1502	0.1433	0.1391	0.1302	0.1233	0.1144
G10	54	C	1	0.1907	0.1837	0.225	0.1881	0.1873	0.175	0.1738	0.1735	0.1708	0.1725	0.1699	0.1683	0.1664	0.1635	0.1622	0.1584	0.1562	0.1527	0.1486	0.1439	0.1384	0.1304	0.1237	0.1202	0.108
G11	54	C	2	0.1923	0.1843	0.185	0.1808	0.1808	0.1765	0.176	0.174	0.1736	0.1714	0.17	0.1693	0.1658	0.1633	0.16	0.1567	0.154	0.1498	0.1473	0.1403	0.1357	0.1259	0.1186	0.1111	0.0966
G12	54	C	3	0.1881	0.1856	0.2261	0.1908	0.1798	0.1721	0.1727	0.1701	0.1691	0.1691	0.1664	0.1674	0.1625	0.1589	0.1569	0.1549	0.1494	0.144	0.1429	0.1319	0.1278	0.1275	0.1032	0.0898	0.075
H1	1	H	1	0.1882	0.1798	0.1757	0.1735	0.1716	0.171	0.1712	0.1716	0.1703	0.17	0.1679	0.1688	0.1652	0.1649	0.1608	0.1632	0.1582	0.1529	0.1479	0.1443	0.1397	0.1308	0.1224	0.1142	0.1024
H2	1	H	2	0.197	0.1873	0.1828	0.1781	0.1768	0.1768	0.1765	0.1771	0.1746	0.1746	0.1733	0.1738	0.1728	0.171	0.1666	0.1644	0.163	0.1593	0.1538	0.1506	0.1447	0.136	0.129	0.1203	0.1121
H3	1	H	3	0.1922	0.185	0.1789	0.1768	0.1761	0.1738	0.1744	0.1746	0.1768	0.1808	0.1817	0.1747	0.1749	0.1705	0.1704	0.1684	0.1677	0.1594	0.164	0.1555	0.1489	0.1399	0.1554	0.126	0.1146
H4	28	H	1	0.1828	0.1745	0.166	0.1644	0.1643	0.1623	0.1627	0.1628	0.1601	0.1604	0.159	0.156	0.1547	0.1527	0.1492	0.1471	0.143	0.143	0.1338	0.1279	0.1207	0.1123	0.104	0.0977	0.088
H5	28	H	2	0.1963	0.1798	0.1847	0.1729	0.1738	0.1724	0.1735	0.1719	0.1698	0.1699	0.1671	0.1672	0.1637	0.162	0.1626	0.1586	0.1553	0.1489	0.1447	0.14	0.1338	0.1256	0.1157	0.1072	0.097
H6	28	H	3	0.182	0.1764	0.1721	0.1701	0.1677	0.1663	0.1662	0.1664	0.164	0.1652	0.1631	0.1618	0.1577	0.1576	0.1538	0.1498	0.1454	0.1413	0.1389	0.1289	0.1212	0.1122	0.1031	0.0929	0.0804
H7	8	H	1	0.1837	0.1766	0.1751	0.1723	0.1725	0.1691	0.1687	0.1681	0.1671	0.168	0.1635	0.1631	0.1631	0.158	0.1547	0.1514	0.1485	0.1448	0.137	0.1314	0.1239	0.1133	0.107	0.0936	0.0801
H8	8	H	2	0.1887	0.1786	0.1758	0.1726	0.1708	0.1711	0.168	0.1667	0.1674	0.1662	0.1644	0.1622	0.16	0.1577	0.1531	0.1506	0.1449	0.1391	0.1331	0.1241	0.1157	0.1065	0.0957	0.0846	0.0706
H9	8	H	3	0.1828	0.1776	0.1714	0.1707	0.1699	0.1677	0.1678	0.166	0.1657	0.1648	0.1626	0.1614	0.1588	0.154	0.1509	0.1477	0.1423	0.1362	0.1293	0.1257	0.115	0.1057	0.0926	0.081	0.0634
H10	54	H	1	0.1927	0.1805	0.1769	0.1742	0.1724	0.171	0.1717	0.1708	0.1694	0.1696	0.1677	0.1663	0.1625	0.1595	0.1572	0.1529	0.1483	0.1423	0.1349	0.1272	0.1197	0.1092	0.0985	0.0885	0.0737
H11	54	H	2	0.1892	0.1845	0.1762	0.1745	0.1738	0.1731	0.1723	0.1711	0.1712	0.1729	0.1686	0.1668	0.1632	0.1622	0.1601	0.1574	0.1513	0.1533	0.1422	0.1365	0.1315	0.1192	0.108	0.1001	0.0818
H12	54	H	3	0.1887	0.1773	0.1711	0.1682	0.1689	0.1676	0.1652	0.1659	0.1646	0.1635	0.1621	0.1614	0.1594	0.1538	0.1507	0.1471	0.1411	0.1377	0.1266	0.1219	0.1099	0.1036	0.0877	0.0767	0.062

## Sheet: color
geno	treat	colorSide	colorInitial	colorAfterHeat	colorChange
57	c	a	4.90001	5.83862	0.938606
28	c	a	4.59821	5.19123	0.593021
1	c	a	4.44581	5.36056	0.914751
57	c	b	5.33542	5.84048	0.505065
28	c	b	4.75018	5.31374	0.563555
1	c	b	4.08706	5.07688	0.989826
54	c	a	4.9353	5.67405	0.738752
58	c	a	4.6397	5.40941	0.769711
9	c	a	5.2824	6.09974	0.81733
54	c	b	4.98955	5.66502	0.675473
58	c	b	4.03066	4.79962	0.768959
9	c	b	5.38697	6.26882	0.881843
34	c	a	4.94926	6.00989	1.06064
8	c	a	4.72483	5.36892	0.644092
2	c	a	4.60052	5.72816	1.12764
34	c	b	5.57098	6.03532	0.464339
8	c	b	5.10847	5.55378	0.445314
2	c	b	4.92241	6.25424	1.33184
53	c	a	5.25765	6.00373	0.746072
30	c	a	4.46495	5.37041	0.905464
29	c	a	4.77506	5.8021	1.02704
53	c	b	4.53261	5.54707	1.01446
30	c	b	4.73828	5.78707	1.0488
29	c	b	5.25127	6.07527	0.823993
63	c	a	5.0993	5.87451	0.775212
35	c	a	5.38017	6.36391	0.98375
63	c	b	4.84255	5.63571	0.793166
35	c	b	5.45643	6.45318	0.996746
1	h	a	4.54374	3.9629	-0.580837
2	h	a	4.56417	5.48472	0.920556
57	h	a	5.0707	4.47777	-0.59293
1	h	b	4.98668	4.41343	-0.573252
2	h	b	4.82735	5.51586	0.688511
57	h	b	4.99842	5.05096	0.052549
9	h	a	5.30613	4.9403	-0.365828
63	h	a	5.10093	3.61402	-1.48691
8	h	a	5.55299	4.81982	-0.733168
9	h	b	5.27504	4.71806	-0.55698
63	h	b	4.65992	3.36586	-1.29405
8	h	b	5.05948	5.47321	0.413735
35	h	a	5.75464	5.92916	0.174527
10	h	a	5.1822	4.54653	-0.635669
28	h	a	4.41716	4.14453	-0.272632
35	h	b	5.22682	4.64809	-0.578732
10	h	b	5.42144	4.68051	-0.740936
28	h	b	5.02077	4.25905	-0.761722
53	h	a	5.08389	5.20017	0.116287
34	h	a	5.0859	3.57593	-1.50997
29	h	a	4.65058	4.39989	-0.250688
53	h	b	4.62369	4.73636	0.11267
34	h	b	4.63324	3.57891	-1.05433
29	h	b	5.09849	4.58197	-0.516514
58	h	a	4.71691	5.39931	0.682403
30	h	a	4.91196	4.92776	0.0157953
54	h	a	4.68736	4.65674	-0.0306193
58	h	b	5.35529	5.31738	-0.0379061
30	h	b	5.19809	5.2684	0.0703126
54	h	b	5.19505	4.70498	-0.490073

## Sheet: sa
geno	treat	saInch2	saCm2
57	h	2.89355	7.34962
57	c	2.98101	7.57177
54	h	3.59941	9.1425
29	h	3.70271	9.40488
54	c	3.89302	9.88827
29	c	3.96297	10.0659
28	h	4.04057	10.263
30	c	4.1151	10.4524
28	c	4.18995	10.6425
30	h	4.27576	10.8604
53	h	4.31005	10.9475
53	c	4.34179	11.0281
8	c	4.39474	11.1626
35	c	4.54692	11.5492
8	h	4.59538	11.6723
58	c	4.81242	12.2235
1	h	4.82263	12.2495
34	c	4.83236	12.2742
63	h	4.84203	12.2988
58	h	4.84829	12.3147
63	c	4.91955	12.4957
35	h	5.04132	12.805
1	c	5.223	13.2664
2	c	5.232	13.2893
9	h	5.29734	13.4552
9	c	5.78159	14.6852
10	h	5.87111	14.9126
34	h	6.01939	15.2893
2	h	6.07151	15.4216

## Sheet: weight
geno	treat	wetweight_volDate	wetweight_dryTubeWT	wetweight_wetTubeWT	wetweight_weightWater	wetweight_volWater	wetweight_withMucusWT	wetweight_finalVol	wetweight_weightMucus_g	wetweight_volMucus_mL
58	h	3oct	12.9258	17.9802	5.0544	4.922	20.0694	6.8	2.0892	1.88
30	h	3oct	12.9336	17.9375	5.0039	4.873	20.1703	6.83	2.2328	1.96
54	h	3oct	12.8194	17.9797	5.1603	5.025	20.246	6.99	2.2663	1.96
29	h	3oct	12.8447	17.934	5.0893	4.956	20.0603	6.85	2.1263	1.89
34	h	3oct	12.8997	17.94	5.0403	4.908	20.801	7.6	2.861	2.69
53	h	3oct	12.9413	18.0352	5.0939	4.96	19.9075	6.59	1.8723	1.63
28	h	3oct	12.9045	17.948	5.0435	4.911	19.7783	6.94	1.8303	2.03
10	h	3oct	12.8689	17.9699	5.101	4.967	21.045	7.78	3.0751	2.81
8	h	3oct	12.8342	17.9233	5.0891	4.956	20.6742	7.54	2.7509	2.58
35	h	3oct	12.8942	18.033	5.1388	5.004	20.9025	7.69	2.8695	2.69
63	h	3oct	12.9456	18.0351	5.0895	4.956	20.0331	7	1.998	2.04
9	h	3oct	12.8754	17.8933	5.0179	4.886	20.144	6.85	2.2507	1.96
2	h	3oct	12.869	18.0187	5.1497	5.015	20.7382	7.53	2.7195	2.52
57	h	3oct	12.9775	18.0034	5.0259	4.894	19.5561	6.62	1.5527	1.73
1	h	3oct	12.8553	17.9865	5.1312	4.997	20.9537	7.95	2.9672	2.95
35	c	3oct	12.8499	17.9476	5.0977	4.947	20.441	7.27	2.4934	2.32
63	c	3oct	12.8946	17.9818	5.0872	4.937	20.0022	7.69	2.0204	2.75
29	c	3oct	12.9602	18.0335	5.0733	4.923	20.0107	6.75	1.9772	1.83
30	c	3oct	12.7938	17.8547	5.0609	4.911	20.0247	7.18	2.17	2.27
53	c	3oct	12.9537	18.0721	5.1184	4.967	20.2091	6.87	2.137	1.9
34	c	3oct	12.9449	18.0185	5.0736	4.923	20.0468	6.73	2.0283	1.81
2	c	3oct	12.8978	17.9656	5.0678	4.918	20.3302	7.13	2.3646	2.21
8	c	3oct	12.8285	17.836	5.0075	4.859	20.3806	7.15	2.5446	2.29
9	c	3oct	12.8084	17.9291	5.1207	4.969	21.2244	8.1	3.2953	3.13
58	c	3oct	12.9378	18.0632	5.1254	4.974	19.9909	6.75	1.9277	1.78
54	c	3oct	12.9059	17.9566	5.0507	4.901	19.834	6.6	1.8774	1.7
57	c	3oct	12.9385	17.9641	5.0256	4.877	18.8705	5.61	0.9064	0.73
28	c	3oct	12.8636	17.9339	5.0703	4.92	20.5787	7.4	2.6448	2.48
1	c	3oct	12.8904	18.0674	5.177	5.024	20.607	7.21	2.5396	2.19
58	h	9oct	12.8461	17.827	4.9809	4.90343	19.3205	6.24	1.4935	1.34
30	h	9oct	12.7602	17.8116	5.0514	4.97283	19.503	6.59	1.6914	1.62
54	h	9oct	12.761	17.855	5.094	5.01477	19.1105	6.19	1.2555	1.18
34	h	9oct	12.8426	17.9535	5.1109	5.0314	19.0215	6.1	1.068	1.07
53	h	9oct	12.9025	18.0133	5.1108	5.03131	19.0562	6	1.0429	0.97
28	h	9oct	12.853	17.8216	4.9686	4.89132	18.6878	5.69	0.8662	0.8
10	h	9oct	12.8578	18.0085	5.1507	5.07058	19.3453	6.29	1.3368	1.22
8	h	9oct	12.8738	17.9561	5.0823	5.00325	18.9298	5.93	0.9737	0.93
35	h	9oct	12.9045	17.9283	5.0238	4.94566	19.1113	6.06	1.183	1.11434
2	h	9oct	12.8893	17.8654	4.9761	4.8987	18.8482	5.89	0.9828	0.99
57	h	9oct	12.8701	17.8883	5.0182	4.94015	18.4089	5.42	0.5206	0.48
1	h	9oct	12.8478	17.8976	5.0498	4.97125	18.5129	5.9	0.6153	0.93
35	c	9oct	12.8116	17.9279	5.1163	4.99541	18.8076	5.97	0.8797	0.97
63	c	9oct	12.7981	17.8226	5.0245	4.90578	18.9781	6.1	1.1555	1.19
29	c	9oct	12.8328	17.9065	5.0737	4.95382	18.4757	5.73	0.5692	0.78
30	c	9oct	12.94	18.0595	5.1195	4.99854	18.9271	5.77	0.8676	0.77
53	c	9oct	12.8532	18.0029	5.1497	5.02802	19.1124	6.05	1.1095	1.02
34	c	9oct	12.9427	17.9928	5.0501	4.93078	18.8999	5.77	0.9071	0.84
2	c	9oct	12.9004	17.942	5.0416	4.92248	19.2501	6.2	1.3081	1.28
8	c	9oct	12.9224	17.9457	5.0233	4.90461	19.0912	6.07	1.1455	1.17
9	c	9oct	12.8595	17.9107	5.0512	4.93185	19.7648	6.73	1.8541	1.8
58	c	9oct	12.9366	17.9527	5.0161	4.89758	18.6525	5.6	0.6998	0.7
54	c	9oct	12.9649	17.9806	5.0157	4.89719	18.48	5.45	0.4994	0.55
57	c	9oct	12.9117	17.9696	5.0579	4.93839	18.4573	5.32	0.4877	0.38
28	c	9oct	12.734	17.8178	5.0838	4.96368	18.7185	5.81	0.9007	0.85
1	c	9oct	12.8505	17.8913	5.0408	4.92169	19.4434	6.38	1.5521	1.46

## Sheet: dry mucus
geno	treat	drymass_lipidDate	drymass_dryTubeWeight	drymass_wetTubeWeight	drymass_afterSpeedvacWeight
2	c	7april	1.1056	1.4108	1.1328
2	h	7april	1.1075	1.4058	1.1246
28	h	7april	1.1187	1.4217	1.1368
28	c	7april	1.1055	1.4114	1.1287
63	h	7april	1.1135	1.4127	1.1416
63	c	7april	1.1036	1.4107	1.1317
34	h	7april	1.1195	1.4142	1.1466
34	c	7april	1.1188	1.4258	1.1424
54	h	7april	1.1062	1.4093	1.1266
54	c	7april	1.1073	1.4134	1.1298
29	h	7april	1.1172	1.4204	1.1419
29	c	7april	1.1074	1.4029	1.1316
58	h	7april	1.1113	1.4138	1.1363
58	c	7april	1.1056	1.4015	1.1243
35	h	7april	1.1054	1.4084	1.1225
35	c	7april	1.1062	1.4122	1.1313
8	h	7april	1.1178	1.4225	1.1452
8	c	7april	1.1106	1.416	1.1344
30	h	7april	1.1065	1.4105	1.1329
30	c	7april	1.1129	1.4084	1.1359
10	h	7april	1.1185	1.4149	1.148
1	c	20feb	1.0068	1.3117	1.0198
1	h	20feb	0.988	1.2825	1.002
9	c	20feb	1.0003	1.3144	1.0123
9	h	20feb	0.98	1.2801	0.9927
53	c	20feb	0.995	1.2997	1.0076
53	h	20feb	1.0063	1.3039	1.0183
57	c	20feb	NA	NA	NA
57	h	20feb	NA	NA	NA

## Sheet: qPCR
geno	treat	its2	actin
1	c	-1	36.78
54	c	-1	36.245
28	c	-1	34.7833
57	c	-1	36.32
29	c	-1	37.32
58	c	-1	36.64
2	c	-1	37.4733
63	c	-1	37.2967
30	c	-1	37.1133
8	c	-1	36.07
34	c	-1	36.91
9	c	-1	38.3
35	c	-1	-1
53	c	-1	-1
1	h	36.635	32.3567
54	h	-1	36.2667
28	h	34.11	33.0933
57	h	-1	35.7333
29H	h	34.36	30.6533
58	h	-1	34.8433
2	h	-1	33.18
63	h	35.125	31.52
30	h	38.64	32.53
8	h	36.4233	32.9267
34	h	37.62	34.09
9	h	36.33	32.3033
35	h	-1	36.59
10	h	-1	-1
53	h	-1	-1
